# Supplementary material for: A Novel Effector, FSE1, Regulates the Pathogenicity of Fusarium oxysporum f. sp. cubense Tropical Race 4 to Banana by Targeting the MYB Transcription Factor MaEFM-Like
Source: MDPI journal article supplement (doi:10.3390/jof9040472), 2023-04-14
Supplement: s1 [file s1]

1 ATGCGGTTCTCAGCTGCGTTCCTCGCAACCGTCCTCGGTGCCGTTAATATCAATGCGCAA  
1 M R F S A A F L A T V L G A V N I N A Q  
61 TGCATCGACGGCCATCGAGAGGTTATCAGCCCCGGCTACACCGTTGAGTACAAGTGCAAC  
21 C I D G H R E V I S P G Y T V E Y K C N  
121 TTCGTCCGACTGGGCGAGACTCACAATGGCGTTTCTCTCTGAAAAGGCCTGCGCTGAGATG  
41 F V R L G E T H N G V L S E K A C A E M  
181 TGTCGCGATGCTGGTAGCTCTGTCTGTACTTATCATCCGCCACCAAACGCTGTGTCTGTC  
61 C R D A G S S V C T Y H P P T K R C V V  
241 GGCAAGGATGGTGGCAAGGAAATGGCCAGTAACGGCGCTATATACATGATGAAAGTCGAC  
81 G K D G G K E M A S N G A I Y M M K V D  
301 GAGCCTGAGATTGAGGACCCTTTTGCTGAAGATGAAGACCCTTTTTCTGTTGATTGCGAA  
101 E P E I E D P F A E D E D P F S V D C E  
361 GCTGAGAAGCAGGCTTGTGAGAGTGGTCAAAAAGCCTTGTCTGGAGCGGGAGAAGAAGCTC  
121 A E K Q A C E S G Q K A C L E R E K K L  
421 AAGGCCTCTCATGCTGGTTTAGAGGCCAAGAACAATAGTCTTGAAGCACGCATCAAGAAT  
141 K A S H A G L E A K N N S L E A R I K N  
481 ATCATGCAATCAAATTGCCCTAGTCAGCATGGTAAGTTTGGGGTTGTTAACAACCGAGAG  
161 I M Q S N C P S Q H G K F G V V N N R E  
541 TACCGCTTCTGGTGCGGCCGACACCACAGCCCCGAAGGATTCAAAGAAGAGCTTCCCGAG  
181 Y R F W C G R H H S P E G F K E E L P E  
601 ATTTACACCATGGCAGACTGCGTCGATCAGTGTAGTCGCAAGGCCTGGTGCAATCATGTC  
201 I Y T M A D C V D Q C S R K A W C N H V  
661 TTACACGGCATTACAAAAACAAGTGCCGTTTGTTCGAGAGTCCCAAGGTTTCCGCAGCC  
221 L H G I H K N K C R L F E S P K V S A A  
721 ACAATGCCAGGTCTTGCCACTGGTGACTGGAAGTGTGGTGTCAAGAAGTAG  
241 T M P G L A T G D W N C G V K K \*

Figure S1. Nucleotide sequence and deduced amino acid sequence of FSE1. Shading indicates the amino acid sequences of the signal peptide and cysteine residues.

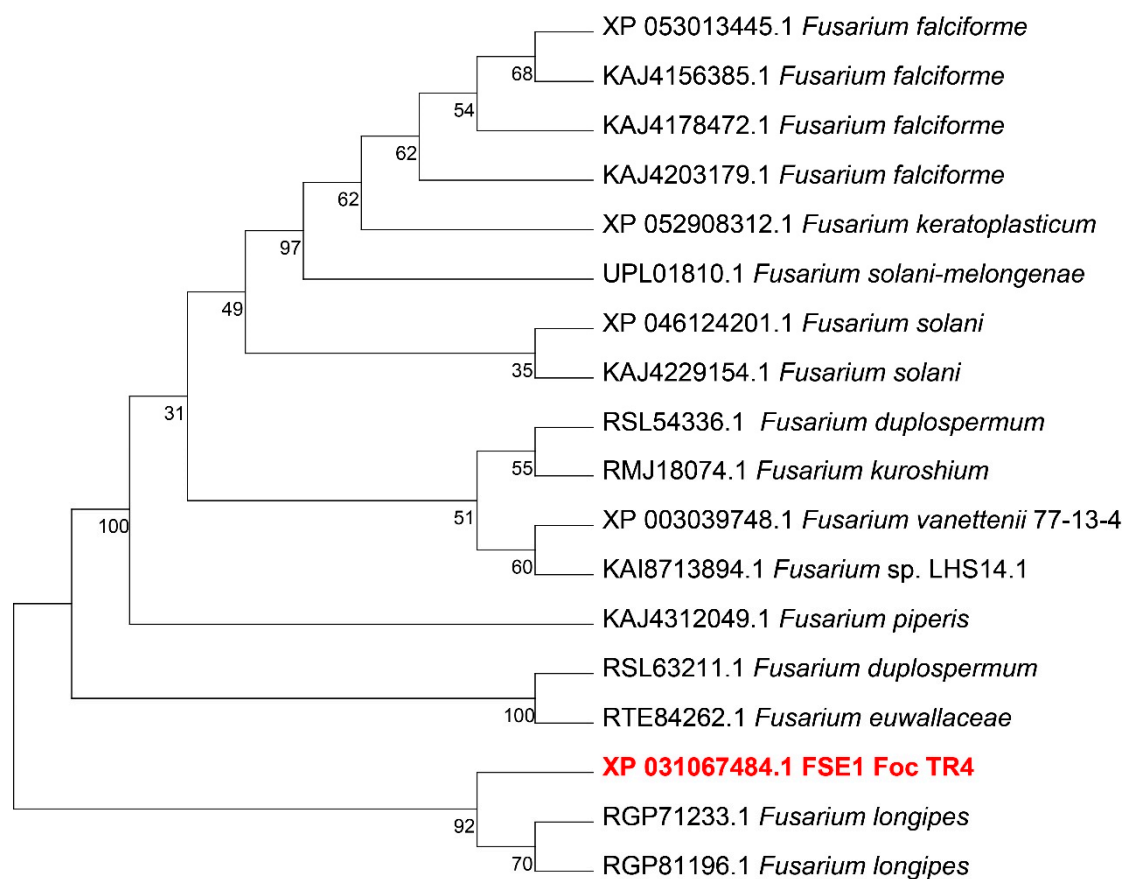

Figure S2. Phylogenetic tree of FSE1 with homologs proteins from several *Fusarium* species.

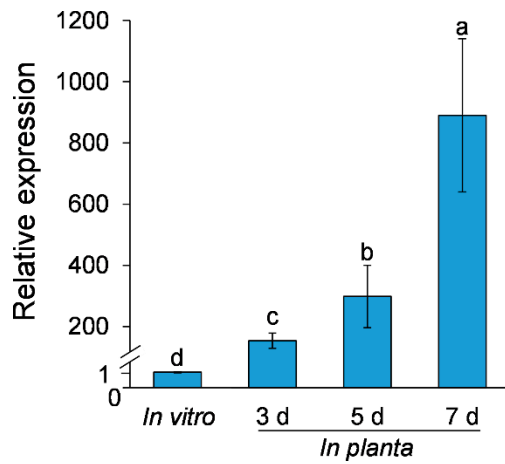

Figure S3. Quantitative real-time PCR analysis of the transcription of *FSE1* after inoculation to banana plantlets for 3, 5, and 7 d. The relative expression level is assessed based on  $2^{-\Delta\Delta C_t}$  method through normalization against the transcription level of the *In vitro* sample. *Actin* has been used as the internal control. Bars represent standard deviations (SD). Columns with different letters indicate significant difference ( $P < 0.05$ ).

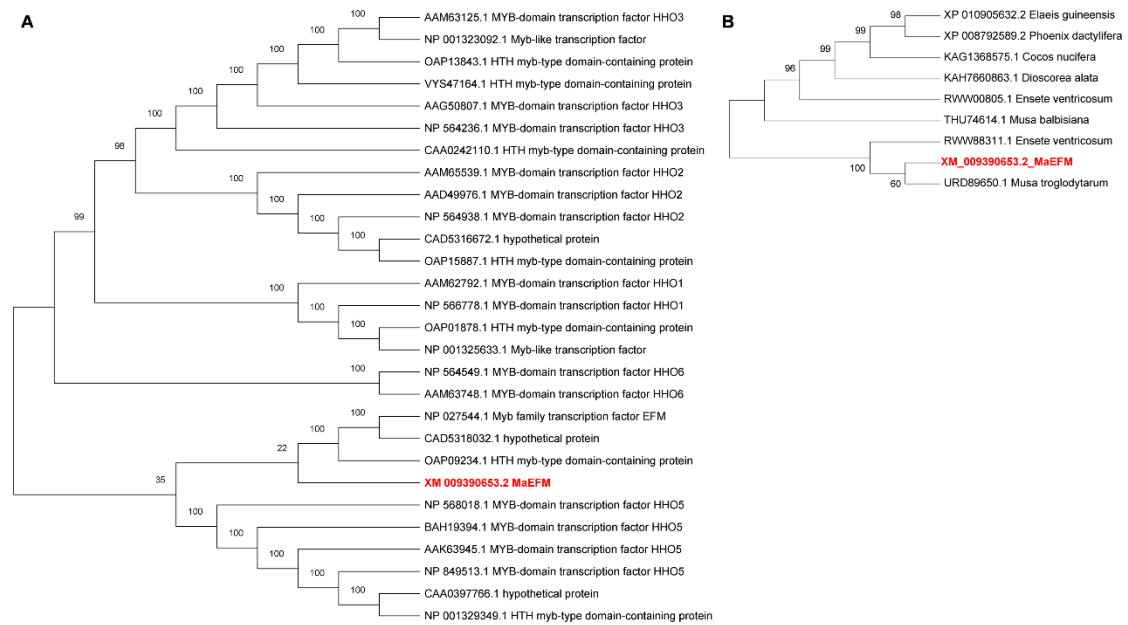

Figure S4. Phylogenetic trees of MaEFM-like with homologs proteins from *Arabidopsis thaliana* and *Musa* species.

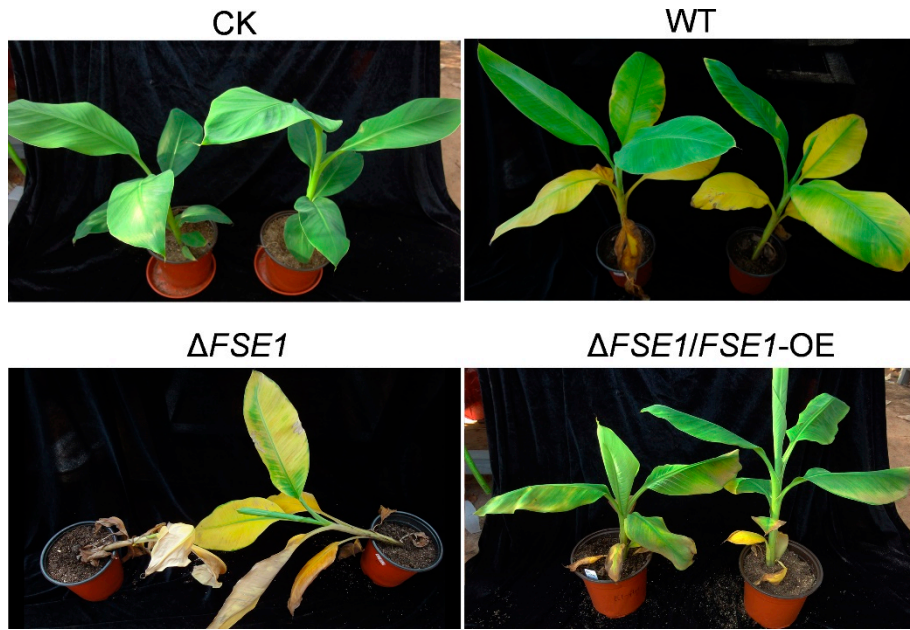

Figure S5. Disease symptoms of banana plantlets after inoculation for 5 weeks.
